# Supplementary material for: Hypermethylation of Hepatic Mitochondrial ND6 Provokes Systemic Insulin Resistance
Source: PubMed Central journal article supplement (PMC8188198; doi:10.1002/advs.202004507), 2021-05-02
Supplement: ADVS-8-2004507-s001.pdf [file ADVS-8-2004507-s001.pdf]

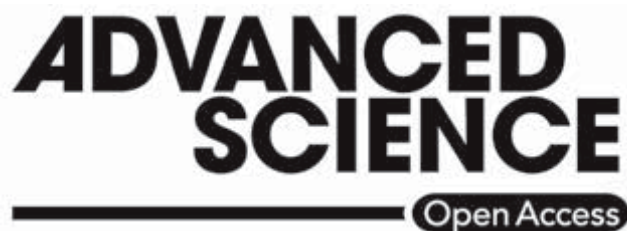

## Supporting Information

for *Adv. Sci.*, DOI: 10.1002/adv.202004507

### **Hypermethylation of hepatic mitochondrial *ND6* provokes systemic insulin resistance**

*Ke Cao, Weiqiang Lv, Xueqiang Wang, Shanshan Dong, Xuyun Liu, Tielin Yang, Jie Xu, Mengqi Zeng, Xuan Zou, Daina Zhao, Qingqing Ma, Mu Ling, Jiangang Long, Weijin Zang, Feng Gao, Zhihui Feng\*, Jiankang Liu\**

Supporting Information

Hypermethylation of hepatic mitochondrial *ND6* provokes systemic insulin resistance

Ke Cao, Weiqiang Lv, Xueqiang Wang, Shanshan Dong, Xuyun Liu, Tielin Yang, Jie Xu, Mengqi Zeng, Xuan Zou, Daina Zhao, Qingqing Ma, Mu Ling, Jiangang Long, Weijin Zang, Feng Gao, Zhihui Feng\*, Jiankang Liu\*

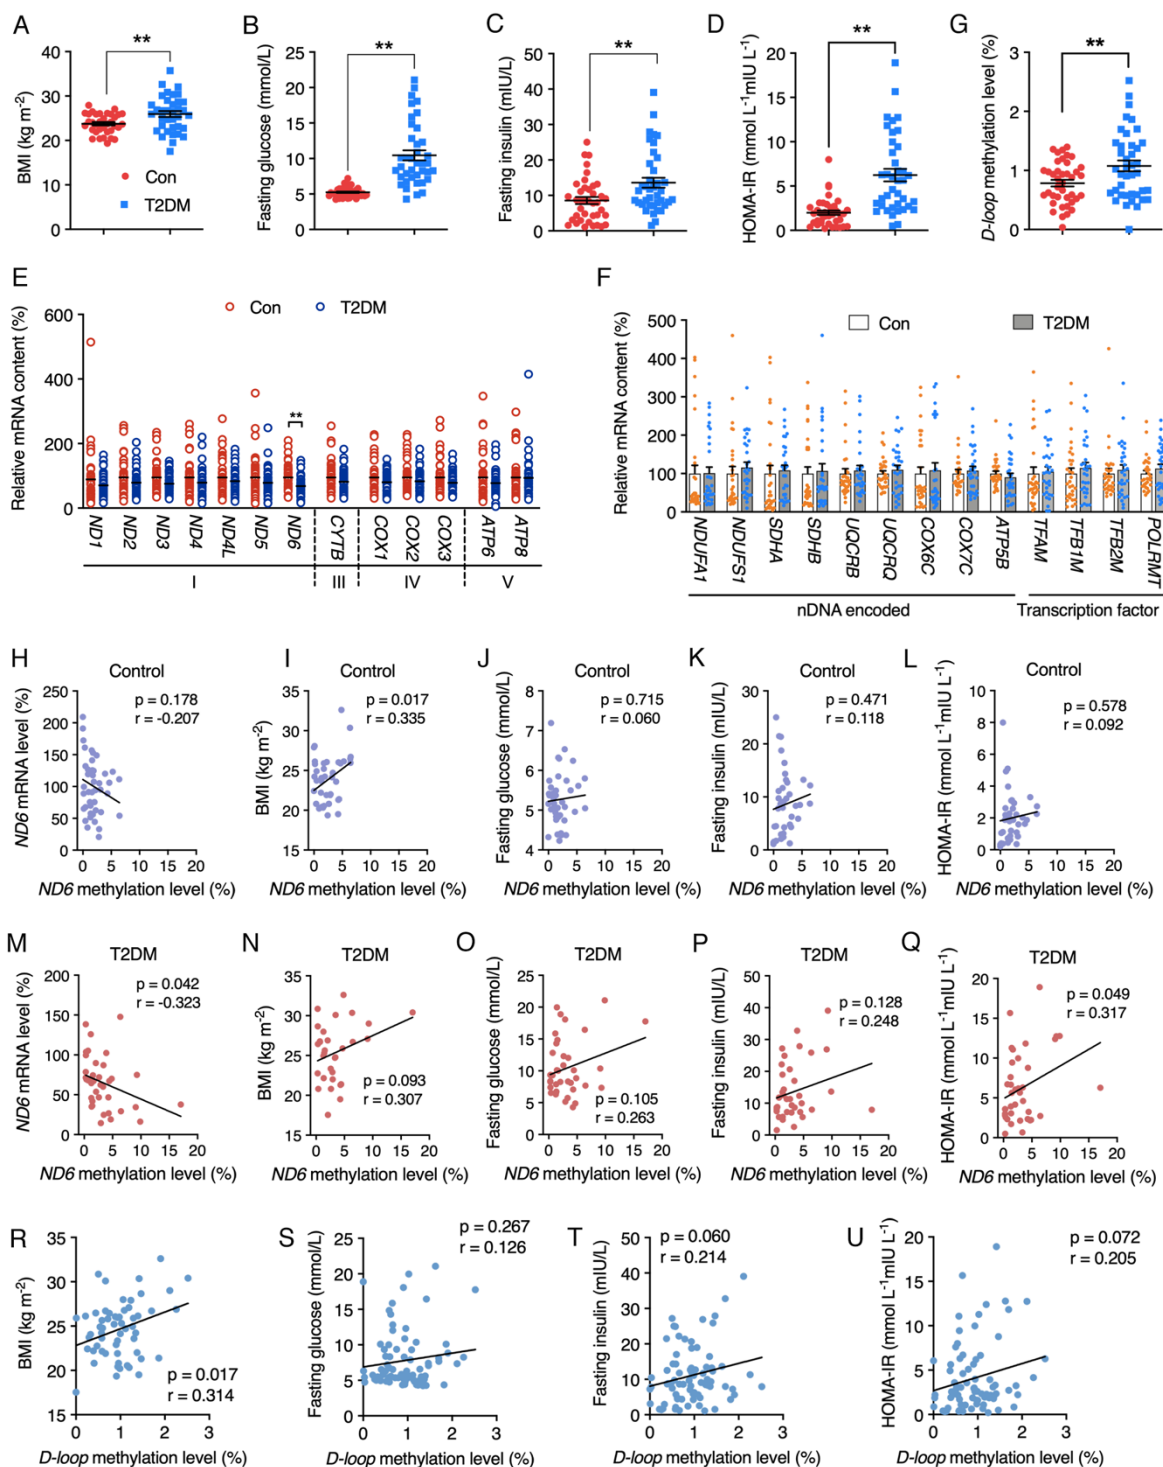

**Figure S1 Linear correlations between clinical parameters and *D-loop* methylation level.** **A-D**, BMI, fasting glucose level, fasting insulin level, and HOMA-IR index in T2DM and non-T2DM subjects. **E**, Relative mRNA levels of 13 mtDNA-encoded OXPHOS complex subunits; **F**, nDNA-encoded OXPHOS complex subunits and mtDNA-related transcription factors; **G**, *D-loop* methylation level in human peripheral leukocytes of T2DM and non-T2DM subjects, in **A-G**,  $n=39$  for each group. **H-L**, Linear correlations between *ND6* mRNA level, BMI, fasting glucose, fasting insulin, HOMA-IR, and *ND6* methylation level in human peripheral leukocytes of non-T2DM subjects,  $n=39$ ; **M-Q**, Linear correlations between *ND6* mRNA level, BMI, fasting glucose, fasting insulin, HOMA-IR, and *ND6* methylation level in human peripheral leukocytes of T2DM subjects,  $n=39$ ; **R**, Linear correlations between BMI and *D-loop* methylation level; **S**, fasting glucose and *D-loop* methylation level; **T**, fasting insulin and *D-loop* methylation level; **U**, HOMA-IR index and *D-loop* methylation level in human peripheral leukocytes,  $n=78$ . Values are mean  $\pm$  SEM. \*\* $p < 0.01$ .

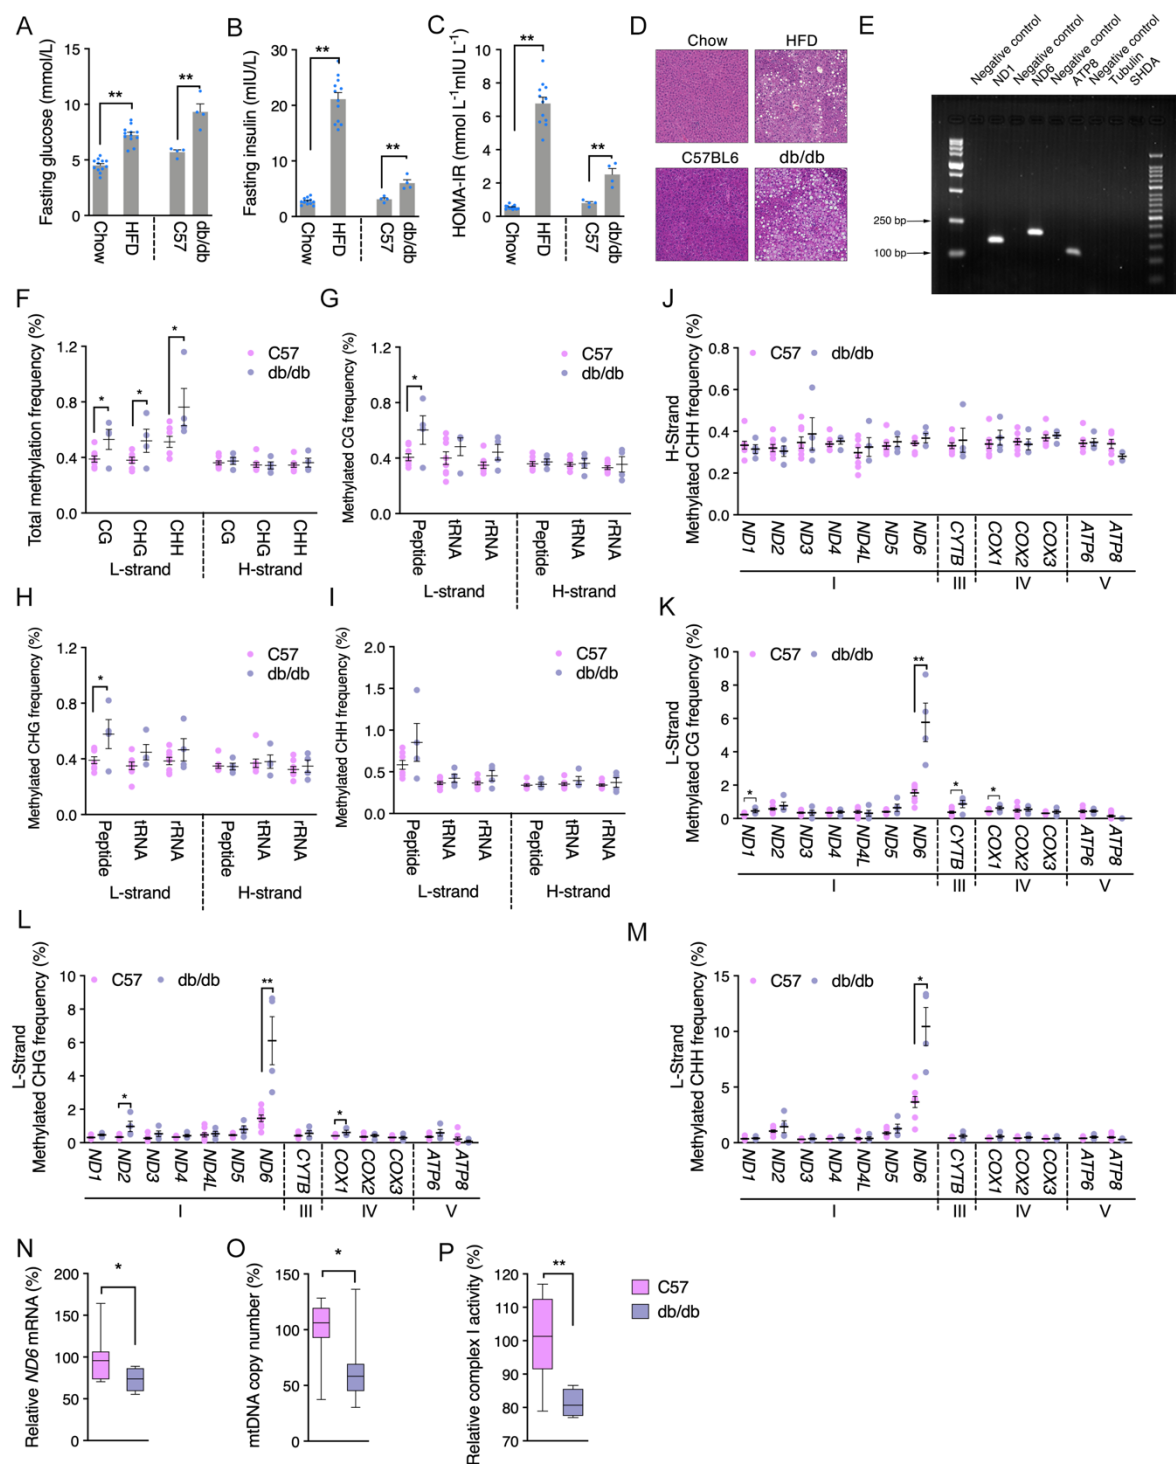

**Figure S2** *ND6* is a primary target of mtDNA methylation in the liver of db/db mice. **A-C**, Fasting glucose, fasting insulin, and HOMA-IR index in HFD and db/db mice. **D**, HE staining of liver tissues. **E**, Confirmation the purity of extracted mtDNA via PCR with specific mitochondrial and nuclear primers. NC1-4, negative control of *ND1*, *ND6*, *ATP8* and *Tubulin*, respectively. Predicted PCR products were *ND1*, 152 bp; *ND6*, 199 bp; *ATP8*, 113 bp; *Tubulin*, 294 bp; *Sdha*, 247 bp. **F**, Total methylated CG, CHG and CHH frequencies; **G-I**, Methylated CG, CHG, and CHH frequencies of peptides, tRNAs and rRNAs on liver mtDNA. **J-M**, Methylated CHH frequencies on H-strand, methylated CHH, CHG, and CG frequencies on L-strand of 13 oxidative phosphorylation (OXPHOS) complex subunits in the liver of control and

db/db mice. **N**, Relative *ND6* mRNA level; **O**, Relative mtDNA copy number; **P**, Relative complex I activity in the liver of the control and db/db mice. Values are mean  $\pm$  SEM.  $n=7$  for the control and 4 for the HFD group, \* $p < 0.05$ , \*\* $p < 0.01$ .

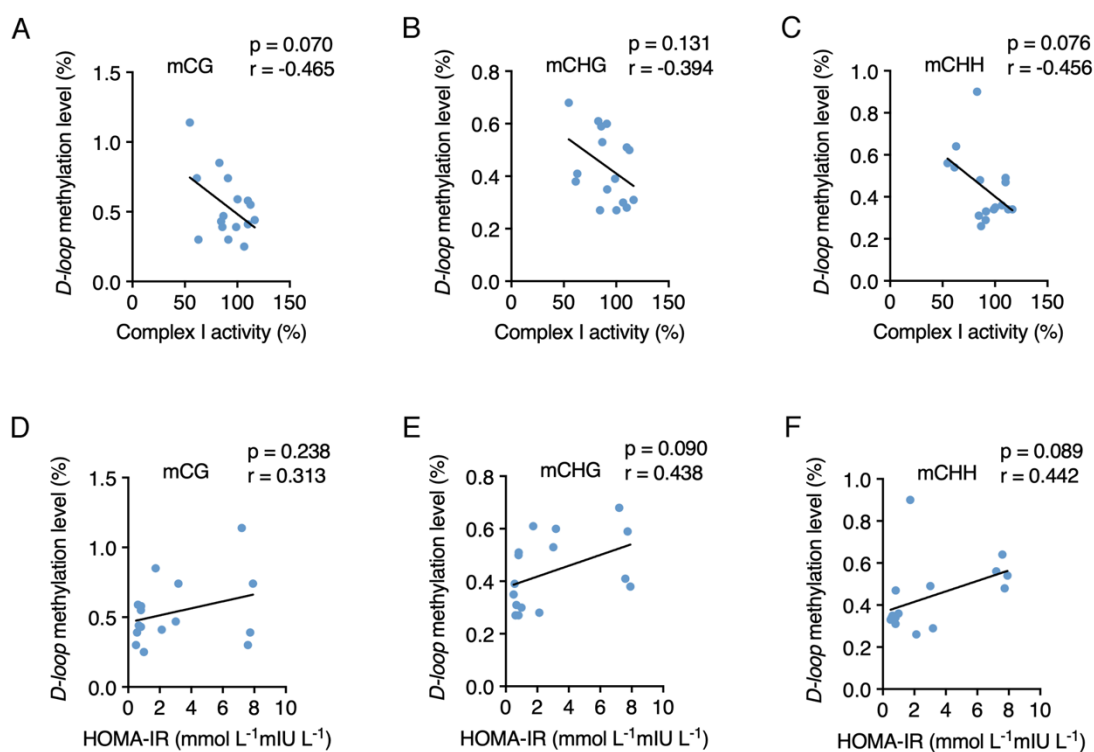

**Figure S3 Correlations between D-loop methylation and complex I activity and HOMA-IR.** **A-C**, Liner correlations between *D-Loop* methylated CG, CHG, CHH frequencies and complex I activity in the liver of control and db/db mice; **D-F**, Liner correlations between *D-Loop* methylated CG, CHG, CHH frequencies and HOMA-IR index in the liver of control and db/db mice.  $N=15$ .

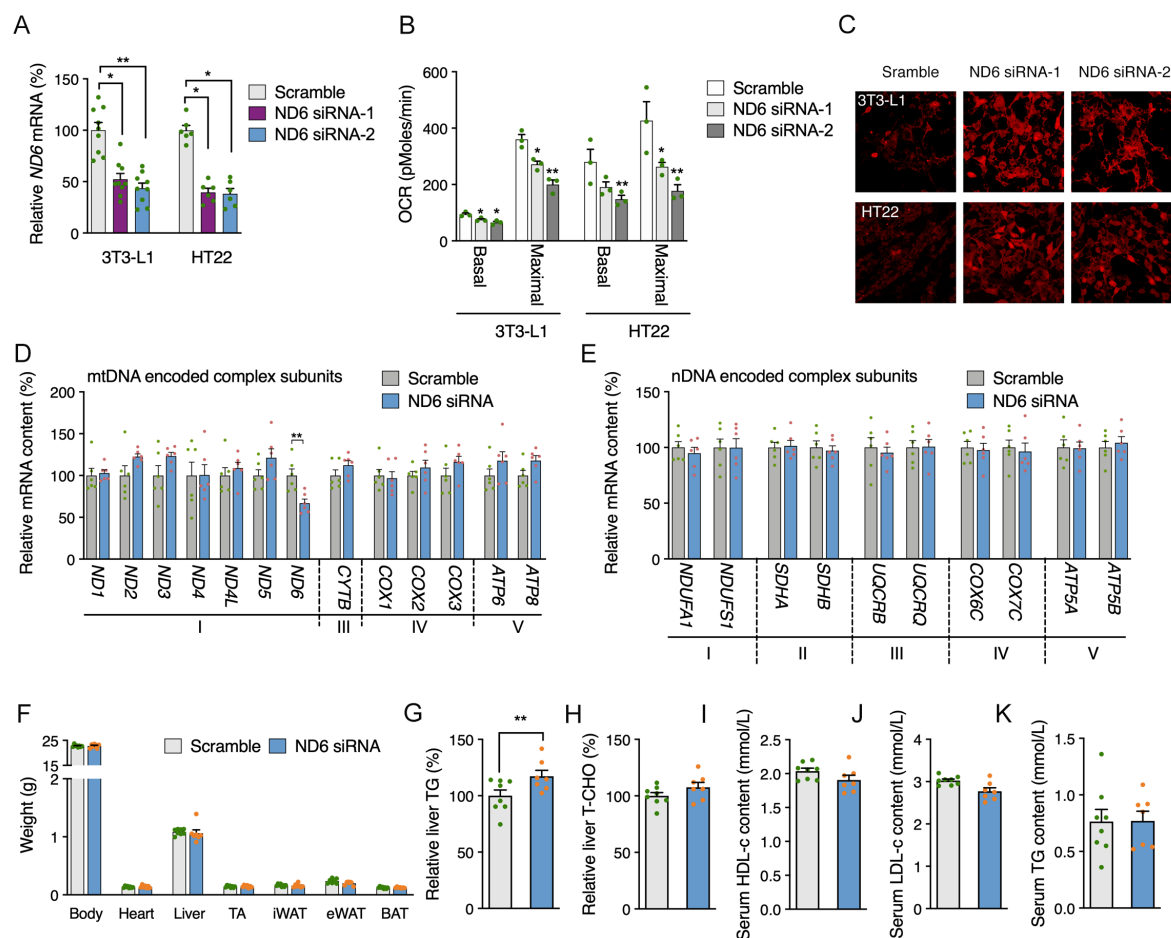

**Figure S4** *ND6* knockdown promotes mitochondrial dysfunction in murine cell lines and hepatic lipid accumulation in mice. **A**, Relative *ND6* mRNA levels; **B**, mitochondrial OCR; **C**, fluorescence of mitochondrial superoxide in 3T3-L1 and HT22 cells transfected with *ND6* siRNA ( $n=3$ ). **D**, Relative mRNA levels of 13 mtDNA-encoded OXPHOS complex subunits in the liver of *ND6* siRNA treated mice ( $n=6$ ). **E**, Relative mRNA levels of nDNA-encoded OXPHOS complex subunits in the liver of *ND6* siRNA treated mice ( $n=6$ ). **F**, Body and tissue weight; **G**, Relative liver TG; **H**, Relative liver T-CHO; **I**, Serum HDL-c; **J**, serum LDL-c of mice; **K**, Serum TG levels in mice treated with *ND6* siRNA for one week ( $n\geq 6$ ). Values are mean  $\pm$  SEM. \* $p < 0.05$ , \*\* $p < 0.01$ .

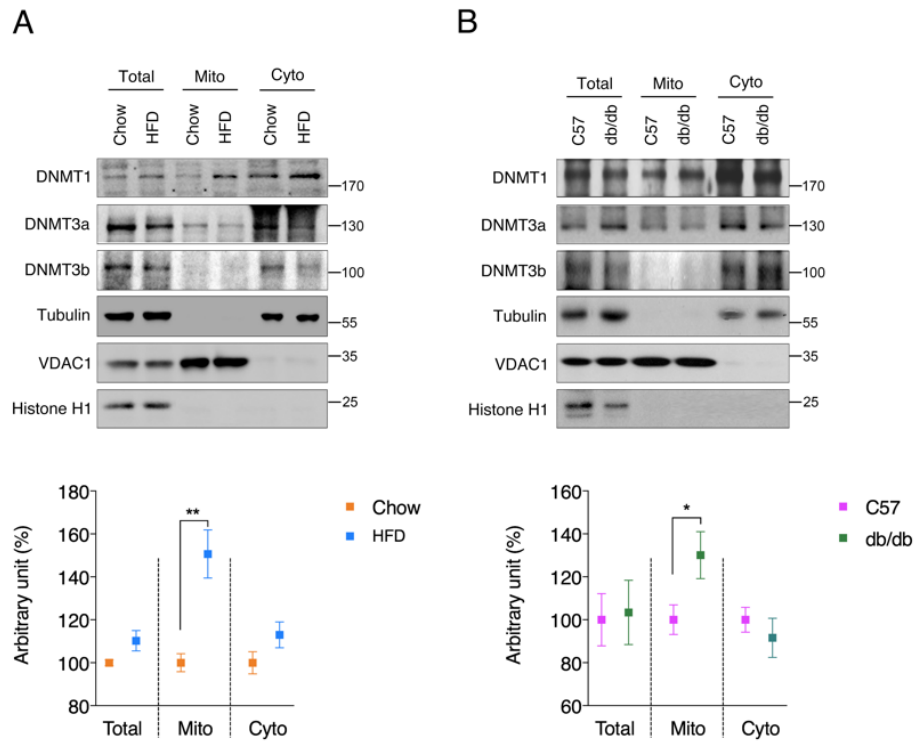

**Figure S5 Increased mitochondrial DNMT1 localization in the liver of HFD mice and db/db mice.** A-B, Western blot analysis of liver DNMT1, DNMT3a and DNMT3b protein levels in total, mitochondrial and cytosolic fractions of HFD mice and (b) db/db mice. Values are mean  $\pm$  SEM.  $n=6$ , \* $p < 0.05$ , \*\* $p < 0.01$ .

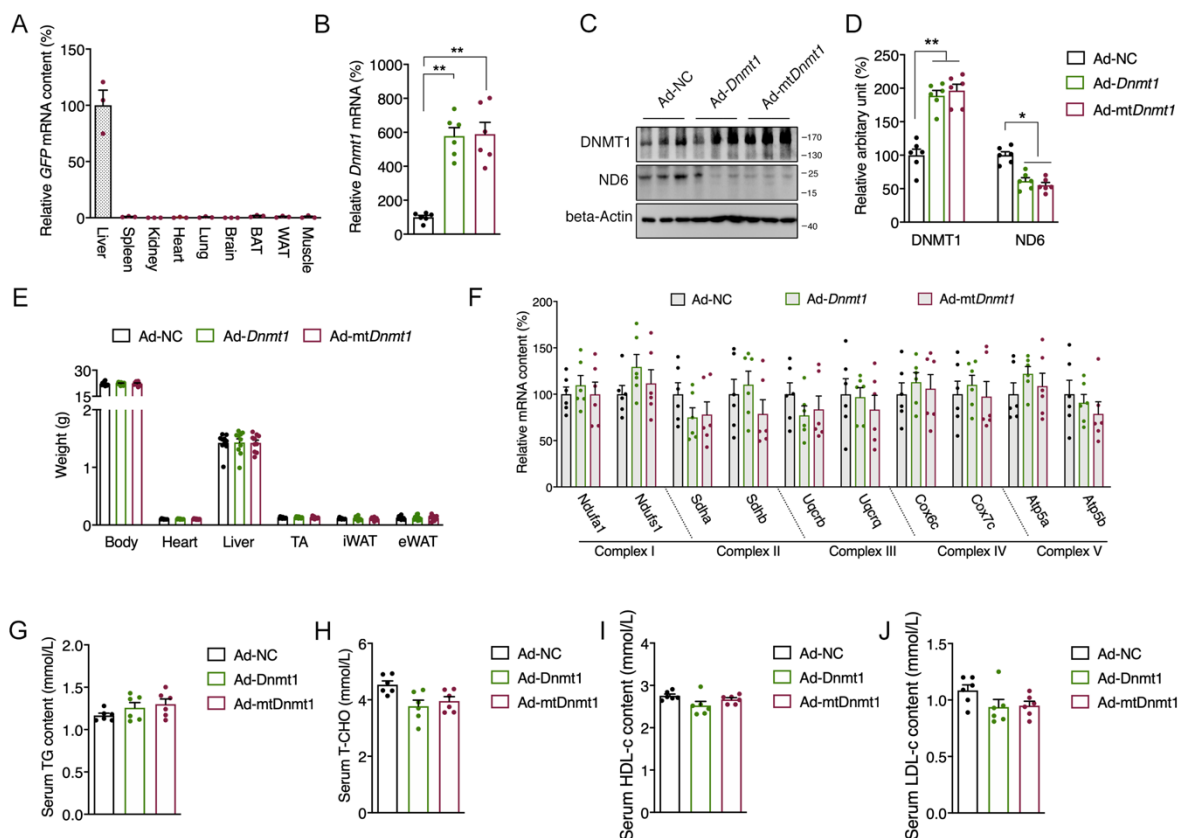

**Figure S6 Characterization of mouse adenovirus infection through tail vein injection.** **A**, *GFP* mRNA expression in the tissues of mice infected with pAd/CMV/V5-*GFP* adenovirus via the tail vein injection ( $n=3$ ). **B**, Relative *Dnmt1* mRNA level in the liver of mice infected with pAd/CMV/V5-*Dnmt1* (Ad-*Dnmt1*), pAd/CMV/V5-mt*Dnmt1* (Ad-mt*Dnmt1*) or pAd/CMV/V5-NC (Ad-NC) adenovirus ( $n=6$ ). **C-D**, Protein levels of DNMT1 and ND6 in the liver of mice infected with adenovirus ( $n=6$ ). **E**, Body and tissue weight of mice after *Dnmt1* overexpression ( $n=8$ ). **F**, Relative mRNA level of nDNA-encoded OXPHOS complex subunits ( $n=6$ ). **G**, Serum TG; **H**, Serum T-CHO; **I**, Serum HDL-c; **J**, Serum LDL-c of mice infected with pAd/CMV/V5-*GFP* adenovirus via the tail vein injection ( $n=6$ ). Values are mean  $\pm$  SEM. \* $p < 0.05$ , \*\* $p < 0.01$ .



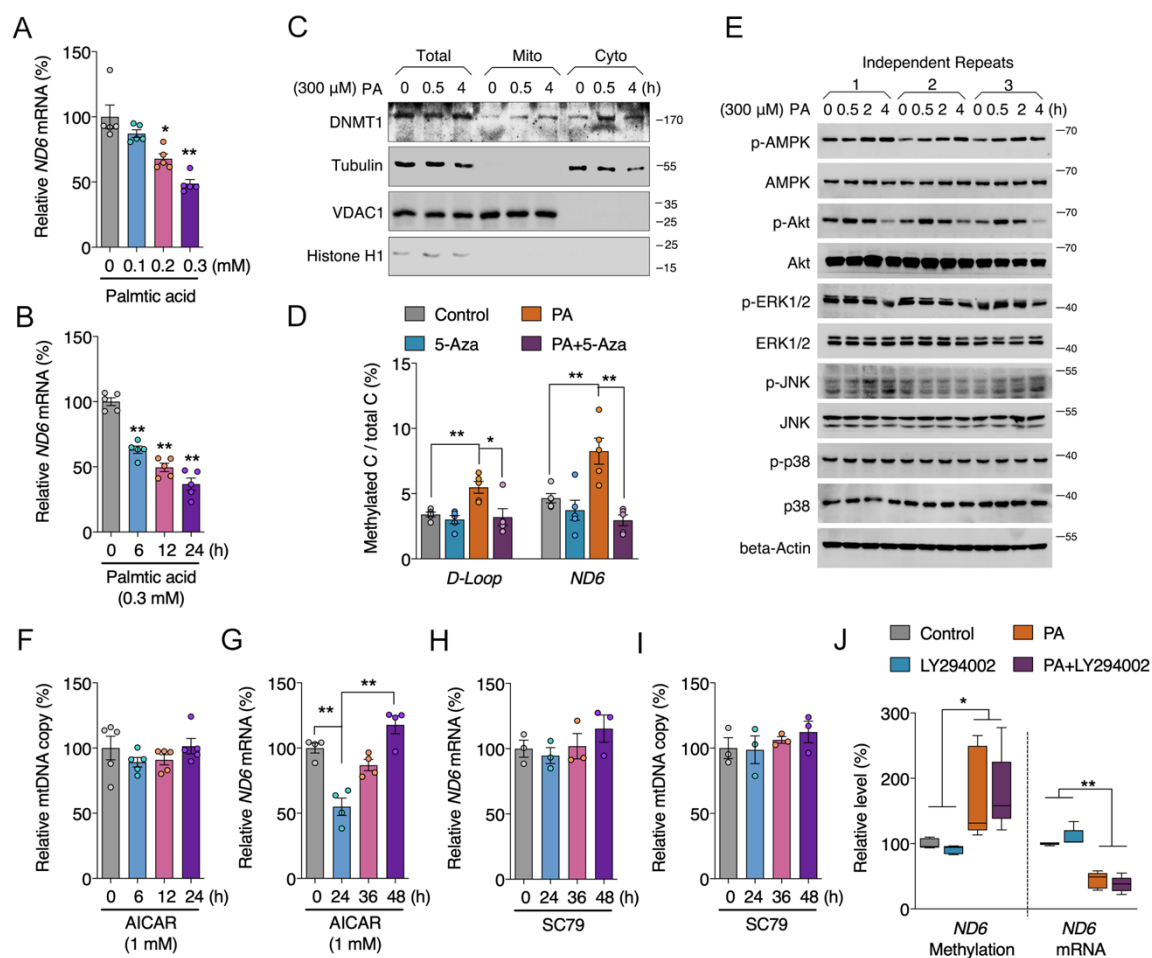

**Figure S7 AMPK activation is associated with PA induced *ND6* hypermethylation by DNMT1.** **A**, Relative *ND6* mRNA level in HepG2 cells under dose dependent PA treatment for 24 h ( $n=5$ ). **B**, Relative *ND6* mRNA level in HepG2 cells under time dependent PA treatment at 300  $\mu$ M ( $n=5$ ). **C**, Western blot analysis of DNMT1 protein subcellular localization in mouse primary hepatocytes under 300  $\mu$ M PA treatment. **D**, Methylation levels of *D-loop* and *ND6* in PA treated cells with or without 2  $\mu$ M 5-Aza for 24 h ( $n=5$ ). **E**, Western blot of p-AMPK, AMPK, p-Akt, Akt, p-ERK1/2, ERK1/2, p-JNK, JNK, p-p38 and p38 in HepG2 cells under time dependent PA treatment at 300  $\mu$ M. **F**, mtDNA copy number in 1 mM AICAR treated cells ( $n=4$ ). **G**, Relative *ND6* mRNA level in cells after prolonged AICAR treatment ( $n=4$ ). **H**, Relative *ND6* mRNA level in HepG2 cells under time dependent 2  $\mu$ M SC79 treatment ( $n=3$ ). **I**, Relative mtDNA copy number in HepG2 cells under time dependent 2  $\mu$ M SC79 treatment ( $n=3$ ). **J**, *ND6* methylation and mRNA levels in PA treated cells with or without 10  $\mu$ M LY294002 for 24 h ( $n=5$ ). Values are mean  $\pm$  SEM. \* $p < 0.05$ , \*\* $p < 0.01$ .

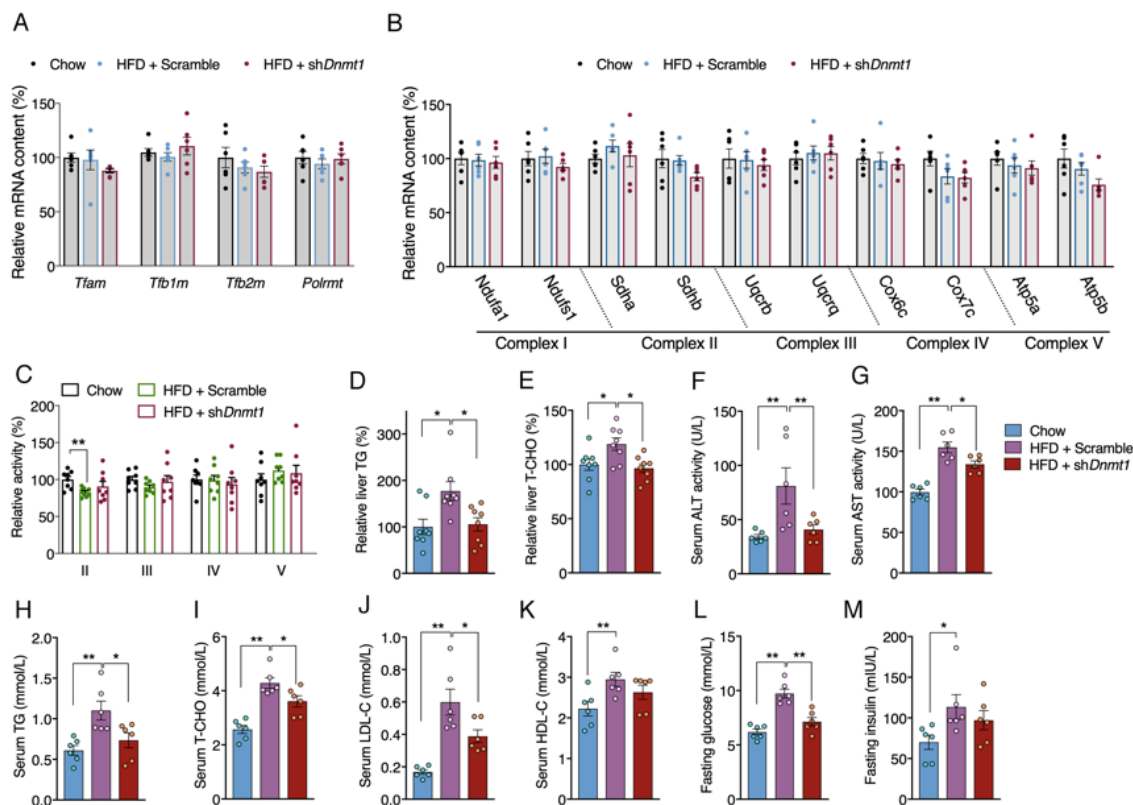

**Figure S8 Hepatic knockdown of *Dnmt1* ameliorates metabolic abnormality induced by HFD.** **A-B**, Relative mRNA levels of mtDNA-related transcription factors and nDNA-encoded OXPHOS complex subunits in the liver of mice under diets and AAV intervention ( $n=6$ ). **C**, Relative complex II-V activities in liver ( $n=8$ ). **D-E**, Relative TG and T-CHO level in the liver ( $n=8$ ). **F-K**, Serum ALT activity, AST activity, TG level, T-CHO level, LDL-c level, and HDL-c level in mice ( $n=6$ ). **L-M**, Fasting glucose and fasting insulin level in mice after diets and AAV intervention ( $n=6$ ). Values are mean  $\pm$  SEM. \* $p < 0.05$ , \*\* $p < 0.01$ .

Table S1 Probabilities of DNMT1 isoforms to mitochondria predicted by MitoProt II.

| Species | Isoform                                                                                            | Length<br>(amino<br>acid) | Probability to<br>mitochondria | Mitochondrial<br>leader peptide                                                                          |
|---------|----------------------------------------------------------------------------------------------------|---------------------------|--------------------------------|----------------------------------------------------------------------------------------------------------|
| Human   | NM_001130823.3<br>NP_001124295.1<br>DNMT1 isoform a                                                | 1632                      | 47.94%                         | MPARTAPARV                                                                                               |
| Human   | NM_001318730.2<br>NP_001305659.1<br>DNMT1 isoform c                                                | 1619                      | 48.33%                         | MPARTAPARV                                                                                               |
| Human   | NM_001318731.2<br>NP_001305660.1<br>DNMT1 isoform d                                                | 1511                      | 38.96%                         | MADANSPPKPLSKPRTPRRS                                                                                     |
| Human   | NM_001379.4<br>NP_001370.1<br>DNMT1 isoform b                                                      | 1616                      | 47.33%                         | MPARTAPARV                                                                                               |
| Human   | DNMT1 isoform b<br>supplemented with<br>an additional MTS<br>reported by Shock<br>et al. (mtDNMT1) | 1717                      | 85.54%                         | MNECLGHRTHLPANRGAWTS<br>PLLRVGGVCARLAHACSLGM<br>AGSVPSFCTGYRLSPFGTSPPP<br>PRPDWGGRRRLRSSPLPIGFRA<br>KSRG |
| Human   | NM_003201.3<br>NP_003192.1<br>TFAM isoform 1<br>precursor                                          | 246                       | 92.26%                         | MAFLRSMWGVLSALGRSGAE<br>LCTGCGSRLRSPFSVYLPRWF<br>SSVLASC                                                 |
| Mouse   | NM_001199431.1<br>NP_001186360.2<br>Dnmt1 isoform 1                                                | 1620                      | 36.13%                         | MPARTAPARV                                                                                               |
| Mouse   | NM_001199432.1<br>NP_001186361.1<br>Dnmt1 isoform 3                                                | 1501                      | 72.45%                         | MADSNRSPRSRPKPRGPRRS                                                                                     |
| Mouse   | NM_001199433.1<br>NP_001186362.1<br>Dnmt1 isoform 4                                                | 1502                      | 72.45%                         | MADSNRSPRSRPKPRGPRRS                                                                                     |
| Mouse   | NM_001314011.1<br>NP_001300940.1<br>Dnmt1 isoform 5                                                | 1627                      | 36.42%                         | MPARTAPARV                                                                                               |
| Mouse   | NM_010066.4<br>NP_034196.5<br>Dnmt1 isoform 2                                                      | 1619                      | 36.13%                         | MPARTAPARV                                                                                               |
| Mouse   | Dnmt1 isoform 1<br>supplemented with<br>an additional MTS<br>reported by Shock<br>et al. (mtDnmt1) | 1673                      | 91.70%                         | MRTPFHGSMVFPHSLALCGT<br>CCFRLRRPLPIGFRAAREKAGV<br>SFRAVLSSATCKMPARTAPARV                                 |

Table S2 Primers used in methylation-specific PCR.

| Species | Region          | Primer (5'-3')                       |
|---------|-----------------|--------------------------------------|
| Human   | <i>D-loop-M</i> | Forward: CGTTTTTTTTTAAATAAGATATTACGA |
|         |                 | Reverse: AAAAATCAAAAACAAATACTACGAC   |
| Human   | <i>D-loop-U</i> | Forward: TGTTTTTTTTTAAATAAGATATTATGA |
|         |                 | Reverse: AAAAATCAAAAACAAATACTACAAC   |

|       |                 |                                                                                   |
|-------|-----------------|-----------------------------------------------------------------------------------|
| Human | <i>ND6-M</i>    | Forward: TTTCGTATTAATAGGATTTTTTCGA<br>Reverse: AATTATCTTTAAATATACTACAACGAT        |
| Human | <i>ND6-U</i>    | Forward: TTTTGTATTAATAGGATTTTTTTGA<br>Reverse: ATAATTATCTTTAAATATACTACAACAAT      |
| Mouse | <i>D-loop-M</i> | Forward: GTTTTTTTTAAATAAGATATTTTCGA<br>Reverse: TACTATCCTTTCATACCTTAACGAC         |
| Mouse | <i>D-loop-U</i> | Forward: GTTTTTTTTAAATAAGATATTTTGA<br>Reverse: TACTATCCTTTCATACCTTAACAAC          |
| Mouse | <i>ND6-M</i>    | Forward: GATATTTTTTAGTAGTTATAGTAGTCGT<br>Reverse: TAATTTTAAAATTTAATAAATCGTT       |
| Mouse | <i>ND6-U</i>    | Forward: TGGATATTTTTTAGTAGTTATAGTAGTTGT<br>Reverse: TAATAATTTTTAAAATTTAATAAATCATT |

Table S3 Primers used in mtDIP.

| Species | Region        | Primer (5'-3')                                                  |
|---------|---------------|-----------------------------------------------------------------|
| Human   | <i>D-loop</i> | Forward: TGCTTGTAAGCATGGGGAGG<br>Reverse: ACATTACTGCCAGCCACCAT  |
| Human   | <i>ND6</i>    | Forward: GGGGTTTGTGGGGTTTTCTTC<br>Reverse: ACCCATATAACCTCCCCCAA |

Table S4 Primers used in real-time PCR.

| Species | Gene          | Primer (5'-3')                                                 |
|---------|---------------|----------------------------------------------------------------|
| Mouse   | <i>ND6</i>    | Forward: CTACCCCAATCCCTCCTT<br>Reverse: GGTTTGGTGGATCGTTTT     |
| Mouse   | <i>Dnmt1</i>  | Forward: GAGGCTGATGATGATGTGTC<br>Reverse: GGAATCATCTGGAATGACCG |
| Mouse   | <i>Ndufa1</i> | Forward: ATGTGGTTCGAGATTCTCCC<br>Reverse: GCAACTCGTTTTTCCTTGC  |
| Mouse   | <i>Ndufs1</i> | Forward: ATCCCATAGGTCAGACAAGC<br>Reverse: CAGTTGTGCGAACATATCCT |
| Mouse   | <i>Sdha</i>   | Forward: AAGATTACAAAGTGCGGGTC<br>Reverse: TTTCATCAGTAGGAGCGGAT |
| Mouse   | <i>Sdhb</i>   | Forward: GTTCTCGGCAGAGTCGG                                     |

|       |                 |                                |
|-------|-----------------|--------------------------------|
|       |                 | Reverse: TCCGCACTTATTCAGATCCA  |
| Mouse | <i>Uqcrb</i>    | Forward: CACTCTCAGGTCAAAATGGC  |
|       |                 | Reverse: ATCTCGCATTAACCCCAGT   |
| Mouse | <i>Uqcrq</i>    | Forward: GCGTCTATCTTCTGTCCCA   |
|       |                 | Reverse: ACCACTACAAACGGCGG     |
| Mouse | <i>Cox6c</i>    | Forward: CATTGGCTACCATGAGTTCC  |
|       |                 | Reverse: CAGCCACGCCAAACTTATAG  |
| Mouse | <i>Cox7c</i>    | Forward: GAGCAAGGTCGTGTAGAAAG  |
|       |                 | Reverse: GAAAATGGCAAATTCTTCCCC |
| Mouse | <i>Atp5a1</i>   | Forward: CATTTTGTGCCAGTCGTCC   |
|       |                 | Reverse: ATTTTGGAGACCAGTCCCG   |
| Mouse | <i>Atp5b1</i>   | Forward: AATTCCTGTTGGTCCTGAGA  |
|       |                 | Reverse: CCAAAGAGTCCGATTTTCCC  |
| Mouse | <i>Tfam</i>     | Forward: AGACTACACTGGGAAACCAC  |
|       |                 | Reverse: GTTAGGCTTATAGGGACCCA  |
| Mouse | <i>Tfb1m</i>    | Forward: CCCAAACCAAAAGTTGATGT  |
|       |                 | Reverse: TTTCCTTCGAAACTGAAACG  |
| Mouse | <i>Tfb2m</i>    | Forward: GGCATTACTTAAAGCTGGTG  |
|       |                 | Reverse: TTTATAGGAACACCTGCTGAC |
| Mouse | <i>Polrmt</i>   | Forward: TTCCCTCAGGAGTTTGTCTG  |
|       |                 | Reverse: TGATAGGGCTGTATGATGGG  |
| Mouse | <i>18S rRNA</i> | Forward: GTAACCCGTTGAACCCCAT   |
|       |                 | Reverse: CCATCCAATCGGTAGTAGCG  |
| Mouse | <i>D-loop</i>   | Forward: AGGCATGAAAGGACAGCA    |
|       | (for DNA)       | Reverse: TTGGCATTAAAGAGGAGGG   |
| Mouse | <i>18S rRNA</i> | Forward: GAGAAACGGCTACCACATCC  |
|       | (for DNA)       | Reverse: CACCAGACTTGCCCTCCA    |
| Human | <i>ND1</i>      | Forward: TTCGCCCTATTCTTCATAGC  |
|       |                 | Reverse: GGAGGTTAGAAGTAGGGTCT  |
| Human | <i>ND2</i>      | Forward: ACACCCTTAATTCCATCCAC  |
|       |                 | Reverse: GAGATAGGTAGGAGTAGCGT  |
| Human | <i>ND3</i>      | Forward: AGAAAAATCCACCCCTTACG  |
|       |                 | Reverse: CATGGTAGGGGTAAAAGGAG  |
| Human | <i>ND4</i>      | Forward: CTCTCTGTGCTAGTAACCAC  |

|       |               |                                                                    |
|-------|---------------|--------------------------------------------------------------------|
|       |               | Reverse: ATGGGGGATAGGTGTATGAA                                      |
| Human | <i>ND4L</i>   | Forward: CACACCTCATATCCTCCCTA<br>Reverse: GCATTGGAGTAGGTTTAGGT     |
| Human | <i>ND5</i>    | Forward: CCTATTCGCAGGATTTCTCA<br>Reverse: AATGTGCATAGTGGGGATT      |
| Human | <i>ND6</i>    | Forward: CAACCATCATTCCCCCTAAA<br>Reverse: GTGGGTTTAGTAATGGGGTT     |
| Human | <i>CYTB</i>   | Forward: AAACCTACTATCCGCCATCC<br>Reverse: GTAAGGGTGAAGGTGATT       |
| Human | <i>COX1</i>   | Forward: CCTAATCACAGCAGTCCTAC<br>Reverse: ATGGGAGATTATTCCGAAGC     |
| Human | <i>COX2</i>   | Forward: AAACCGTCTGAACTATCCTG<br>Reverse: AATGGGGGAAGTATGTAGGA     |
| Human | <i>COX3</i>   | Forward: CGCTAAATCCCCTAGAAGTC<br>Reverse: AGCCAATAATGACGTGAAGT     |
| Human | <i>ATP6</i>   | Forward: GATCCCCACCTCCAAATATC<br>Reverse: TAAGAGATCAGGTTTCGTCCT    |
| Human | <i>ATP8</i>   | Forward: AACACAACTACCACCTACC<br>Reverse: CAATGAATGAAGCGAACAGA      |
| Human | <i>NDUFA1</i> | Forward: ACCCAGAAGTAGGGTTTTGG<br>Reverse: TTCTCAAACCCTTTGACAC      |
| Human | <i>NDUFS1</i> | Forward: CAAGGATTCTAGTCCCTCCG<br>Reverse: CTTAACATATTGCTTCTCCCCG   |
| Human | <i>SDHA</i>   | Forward: AACATGGAGGAGGACAACCTG<br>Reverse: CATATCGCAGAGACCTTCCA    |
| Human | <i>SDHB</i>   | Forward: TTGTTCCCGATTTGAGCAAC<br>Reverse: TCACGCTCTTCTATGGACTG     |
| Human | <i>UQCRB</i>  | Forward: TGGTCAAATGGCTGGTAAG<br>Reverse: CTCGCATTAACCCAGTTTA       |
| Human | <i>UQCRQ</i>  | Forward: TCAGCTACAGCTTGTCACC<br>Reverse: AAACACTACAACTGCGGC        |
| Human | <i>COX6C</i>  | Forward: GCTTTGTATAAGTTTCGTGTGG<br>Reverse: AACTGAGAAAGACTTACTGTCC |
| Human | <i>COX7C</i>  | Forward: GATCTGCATTTGCTACACCC                                      |

|       |                              |                                                                                                 |
|-------|------------------------------|-------------------------------------------------------------------------------------------------|
| Human | <i>ATP5B1</i>                | Reverse: GGCTGCACCTCTTAAAATGC<br>Forward: CCTGTTGGTCCTGAGACTTT<br>Reverse: CCAAAAAGCCCAATTTTGCC |
| Human | <i>TFAM</i>                  | Forward: CCAAGAAGCTAAGGGTGATT<br>Reverse: TGTTTCTTTATTGTGCGACG                                  |
| Human | <i>TFB1M</i>                 | Forward: AAGTTGTTAAGACTGCAAGC<br>Reverse: TTTCAACCACCAGAAGTTCA                                  |
| Human | <i>TFB2M</i>                 | Forward: TGGATGGAAAACACTACGAGTG<br>Reverse: GGAAGTCTTCTATTCCCAA                                 |
| Human | <i>POLRMT</i>                | Forward: AAGGTCAAGCAAATAGGAGG<br>Reverse: GTCAGGCCCTTCCTGTA                                     |
| Human | <i>18S rRNA</i>              | Forward: GTAACCCGTTGAACCCCAT<br>Reverse: CCATCCAATCGGTAGTAGCG                                   |
| Human | <i>D-loop</i><br>(for DNA)   | Forward: CAGTACCTAACAAACCCACA<br>Reverse: GAGGTCGTAAACCCTATTGT                                  |
| Human | <i>18S rRNA</i><br>(for DNA) | Forward: TGGTGAGCTGCGAGAATAG<br>Reverse: TTTTATGGTAATAACGCGGC                                   |

---
